# Supplementary material for: Adipose-derived Stem/Stromal Cells on Electrospun Fibrin Microfiber Bundles Enable Moderate Muscle Reconstruction in a Volumetric Muscle Loss Model
Source: PubMed Central journal article supplement — Cell Transplant. 2018 Oct 9;27(11):1644–56. doi: 10.1177/0963689718805370 (PMC6299198; doi:10.1177/0963689718805370), 2018-10-09
Supplement: Gilbert-Honick_Supplemental_Information.pdf [file Gilbert-Honick_Supplemental_Information.pdf]

|                | CD31 | CD34 | CD73   | CD90   | CD105  |
|----------------|------|------|--------|--------|--------|
| <b>Donor 1</b> | 0.5% | 2.8% | 100.0% | 100.0% | 100.0% |
| <b>Donor 2</b> | 0.4% | 0.2% | 99.8%  | 100.0% | 99.9%  |

**Supplemental Table 1. ASC characterization via flow cytometry.** ASCs at passage 3 from both donors used in the study were incubated with antibodies to CD31, CD34, CD73, CD90, and CD105 and assessed through flow cytometry.

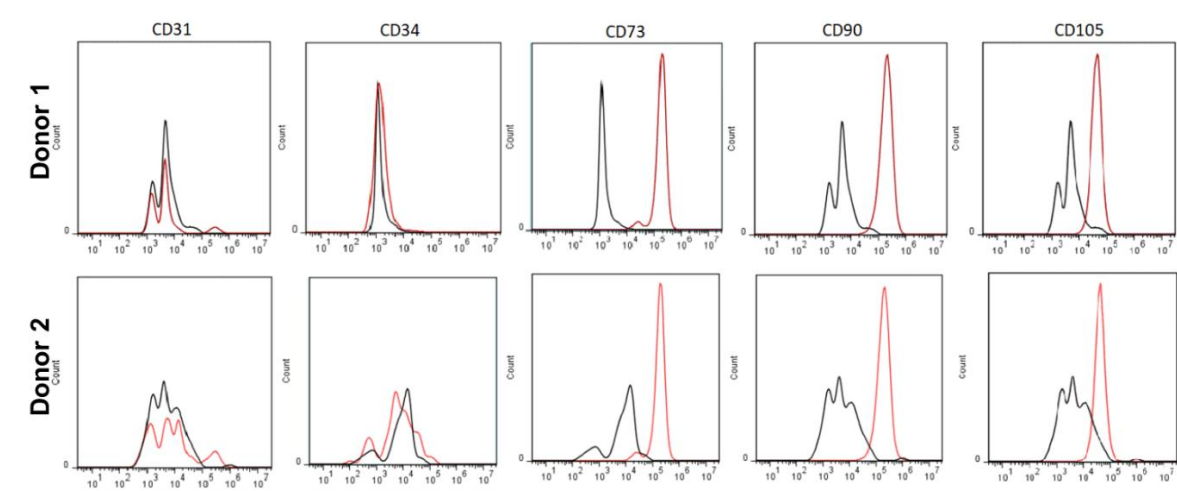

**Supplemental Figure 1. ASC characterization via flow cytometry.** Histograms depicting flow cytometry data for ASCs from two donors.

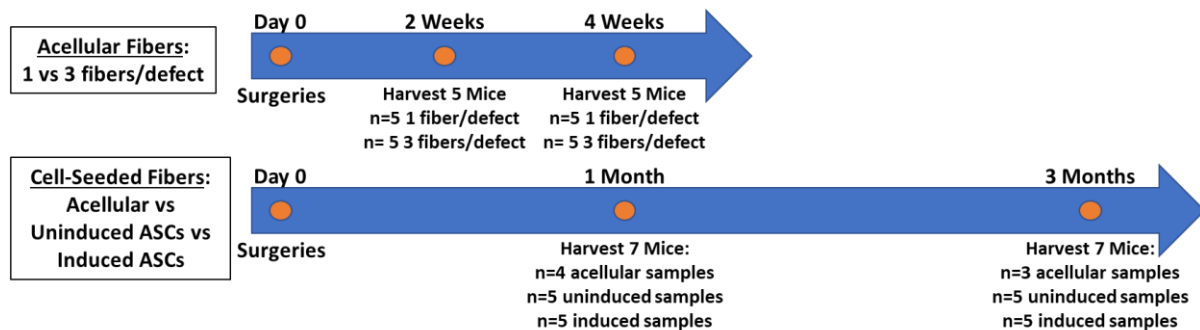

**Supplemental Figure 2. Timelines for *in vivo* experiments.** Experiment lengths, experimental groups, sample sizes, and harvest dates for the acellular and cell-seeded *in vivo* experiments.

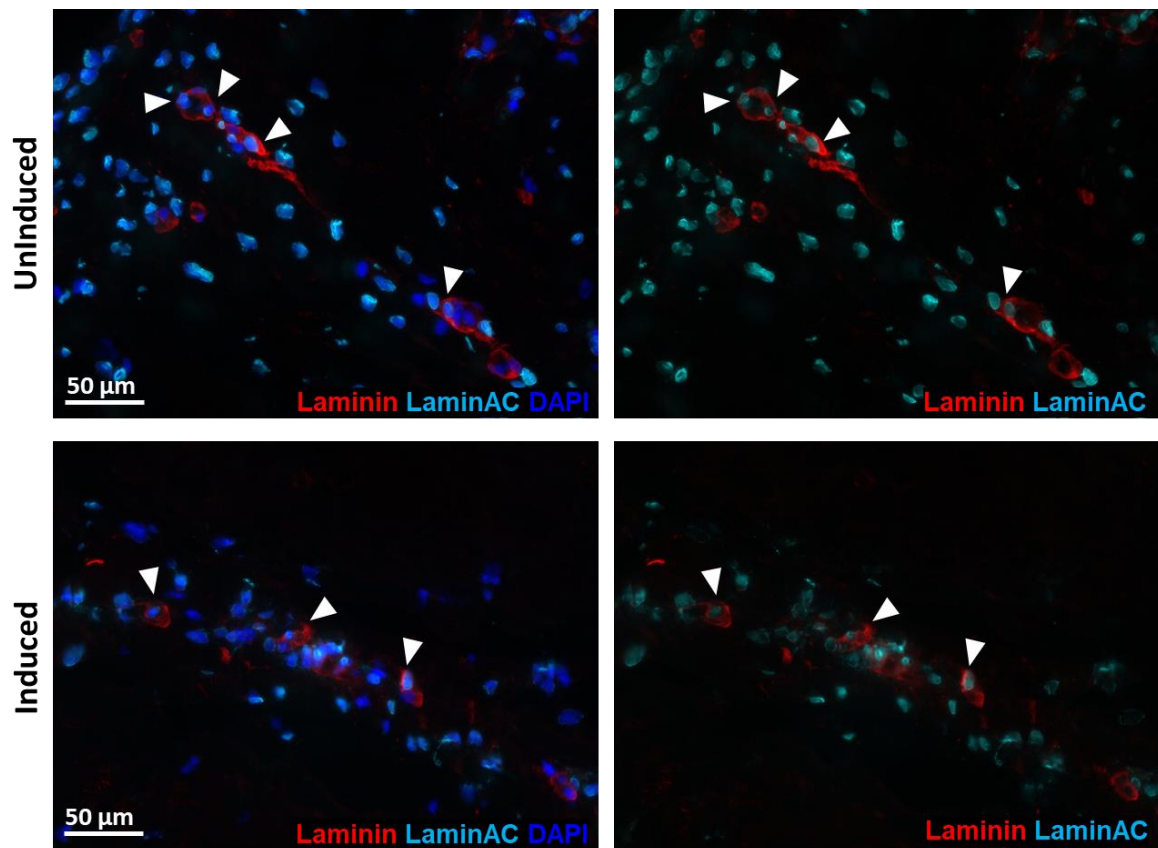

**Supplemental Figure 3. Immunostaining of laminin and human-Lamin AC in the fiber interior.** Sections of the excised defect site were stained with laminin (red), human-specific LaminAC (cyan), and DAPI (blue). Images shown are uninduced and induced samples at 4 weeks.
